# Supplementary material for: Distinct subnetworks of the mouse anterior thalamic nuclei
Source: Research Square preprint supplement (doi:10.21203/rs.3.rs-4356188/v1), 2025-05-05
Supplement: Supplementary file 1 [file 62cd5b47fae06489f2732c61.xlsx]

## Sheet: Sheet1
Table 2. Brain structure and tracer abbreviations
Acronym	Full structure name
AAV	Adeno-associated virus
AAV-GFP	Adeno-associated virus, green fluorescent protein
AAV-RFP	Adeno-associated virus, red fluorescent protein
ac	Anterior commissure
ACAd	Anterior cingulate cortical area, dorsal part
rACAd	Anterior cingulate cortical area, dorsal part, rostral region
cACAd	Anterior cingulate cortical area, dorsal part, caudal region
ACAv	Anterior cingulate cortical area, ventral part
rACAv	Anterior cingulate cortical area, ventral part, rostral region
cACAv	Anterior cingulate cortical area, ventral part, caudal region
ACB	Nucleus accumbens
AD	Anterodorsal nucleus of the thalamus
ADl	Anterodorsal nucleus of the thalamus, lateral domain
ADm	Anterodorsal nucleus of the thalamus, medial domain
AM	Anteromedial nucleus of the thalamus
AMd	Anteromedial nucleus of the thalamus, dorsal part
AMd.c	Anteromedial nucleus of the thalamus, dorsal part, core domain
AMd.d	Anteromedial nucleus of the thalamus, dorsal part, dorsal domain
AMd.dl	Anteromedial nucleus of the thalamus, dorsal part, dorsolateral domain
AMd.dm	Anteromedial nucleus of the thalamus, dorsal part, dorsomedial domain
AMd.l	Anteromedial nucleus of the thalamus, dorsal part, lateral domain
AMd.m	Anteromedial nucleus of the thalamus, dorsal part, medial domain
AMv	Anteromedial nucleus of the thalamus, ventral part
AV	Anteroventral nucleus of the thalamus
AVd	Anteroventral nucleus of the thalamus, dorsal domain
AVl	Anteroventral nucleus of the thalamus, lateral domain
AVm	Anteroventral nucleus of the thalamus, medial domain
AVmt	Anteroventral nucleus of the thalamus, medial tip domain
AQ	Cerebral aqueduct
BLA	Basolateral amygdalar complex
BLAa	Basolateral amygdalar nucleus, anterior part
BLA.ac	Basolateral amygdalar nucleus, anterior part, caudal domain
BLAp	Basolateral amygdalar nucleus, posterior part
BLAv	Basolateral amygdalar nucleus, ventral part
BMAp	Basomedial amygdalar nucleus, posterior part
BST	Bed nuclei of the stria terminalis
CEA	Central amygdalar nucleus
CM	Central medial nucleus of the thalamus
CP	Caudoputamen
CPc	Caudoputamen, caudal part
CPc.dm	Caudoputamen, caudal part, dorsomedial region
CPc.dm.d	Caudoputamen, caudal part, dorsomedial region, dorsal domain
CPi	Caudoputamen, intermediate part
CPi.dm	Caudoputamen, intermediate part, dorsomedial region
CPi.dm.d	Caudoputamen, intermediate part, dorsomedial region, dorsal domain
CPi.dm.dm	Caudoputamen, intermediate part, dorsomedial region, dorsomedial domain
CPi.vm	Caudoputamen, intermediate part, ventromedial region
CTB	Cholera toxin subunit B
DR	Dorsal raphe nucleus
DTN	Dorsal tegmental nucleus
ECT	Ectorhinal cortical area
rECT	Ectorhinal cortical area, rostral region
cECT	Ectorhinal cortical area, caudal region
ENT	Entorhinal cortical area
ENTl	Entorhinal cortical area, lateral part
cENTl	Entorhinal cortical area, lateral part, caudal region
rENTl	Entorhinal cortical area, lateral part, rostral region
ENTm	Entorhinal cortical area, medial part
FG	Fluorogold
IAD	Interanterodorsal nucleus of the thalamus
IAM	Interanteromedial nucleus of the thalamus
ILA	Infralimbic cortical area
IMD	Intermediodorsal nucleus of the thalamus
int	Internal capsule
LA	Lateral amygdalar area
LD	Laterodorsal nucleus of the thalamus
LDT	Laterodorsal tegmental nucleus
LM	Lateral mammillary nucleus
LS	Lateral septum
MD	Mediodorsal nucleus of the thalamus
MDm	Mediodorsal nucleus of the thalamus, medial part
MEA	Medial amygdalar nucleus
MM	Medial mammillary nucleus
MMl	Medial mammillary nucleus, lateral part
MMm	Medial mammillary nucleus, medial part
MMmed	Medial mammillary nucleus, median part
MOs	Secondary motor cortical area
MOs fef	Secondary motor cortical area, frontal eye field region
ORB	Orbital cortical area
ORBl	Orbital cortical area, lateral part
ORBm	Orbital cortical area, medial part
ORBvl	Orbital cortical area, ventrolateral part
OT	Olfactory tubercle
PAR	Parasubiculum
PERI	Perirhinal cortical area
rPERI	Perirhinal cortical area, rostral region
cPERI	Perirhinal cortical area, caudal region
PF	Parafascicular nucleus of the thalamus
PH	Posterior hypothalamic nucleus
PHAL	Phaseolus vulgaris leucoagglutinin
PL	Prelimbic cortical area
POST	Postsubiculum
PRE	Presubiculum
PT	Parataenial nucleus of the thalamus
PTLp	Posterior parietal association area
PTLp cl	Posterior parietal association area, caudal lateral part
PTLp cm	Posterior parietal association area, caudal medial part
PVT	Paraventricular nucleus of the thalamus
rPVT	Paraventricular nucleus of the thalamus, rostral region
cPVT	Paraventricular nucleus of the thalamus, caudal region
RE	Reuniens nucleus of the thalamus
RH	Rhomboid nucleus of the thalamus
RSP	Retrosplenial cortical area
RSPagl	Retrosplenial cortical area, agranular part
RSPd	Retrosplenial cortical area, dorsal part
RSPv	Retrosplenial cortical area, ventral part
RT	Reticular nucleus of the thalamus
SC	Superior colliculus
sm	Stria medularis
SNr	Substantia nigra, pars reticulata
SUB	Subiculum
SUBd	Subiculum, dorsal part
SUBv	Subiculum, ventral part
TEa	Temporal association cortical area
rTEa	Temporal association cortical area, rostral region
cTEa	Temporal association cortical area, caudal region
VIS	Visual cortical area
VISal	Anterolateral visual cortical area
VISam	Anteromedial visual cortical area
VISl	Lateral visual cortical area
VISp	Primary visual cortical area
VISpm	Posteromedial visual cortical area
VTA	Ventral tegmental area
VTN	Ventral tegmental nucleus
ZI	Zona incerta
Lower case, italicized acronyms denote fiber tracts.
