# Supplementary material for: Distinct subnetworks of the mouse anterior thalamic nuclei
Source: Research Square preprint supplement (doi:10.21203/rs.3.rs-4356188/v1), 2025-05-05
Supplement: Supplementary file 2 [file 9fa006aab1d377aa2716e293.xlsx]

## Sheet: Sheet1
Table 1. Injections
Region of Interest (ROI)	Number of injections
Anterior cingulate cortical area, dorsal part (ACAd)	6
Anterior cingulate cortical area, ventral part (ACAv)	8
Anterodorsal nucleus of the thalamus (AD)	2
Anteromedial nucleus of the thalamus (AMd)	24
Anteromedial nucleus of the thalamus, ventral part (AMv)	2
Anteroventral nucleus of the thalamus (AV)	5
Basolateral amygdalar nucleus, anterior part (BLAa)	2
Caudoputamen, caudal part, dorsomedial region (CPc.dm)	6
Caudoputamen, intermediate part, dorsomedial region (CPi.dm)	5
Dorsal tegmental nucleus (DTN)	3
Entorhinal cortical area, lateral part (ENTl)	12
Entorhinal cortical area, medial part (ENTm)	7
Infralimbic cortical area (ILA)	10
Laterodorsal tegmental nucleus (LDT)	4
Lateral mammillary nucleus (LM)	2
Medial mammillary nucleus, lateral part (MMl)	2
Medial mammillary nucleus, medial part (MMm)	4
Medial mammillary nucleus, median part (MMme)	1
Secondary motor cortical area (MOs)	14
Secondary motor cortical area, frontal eye field region (MOs-fef)	3
Orbital cortical area, lateral part (ORBl)	1
Orbital cortical area, medial part (ORBm)	3
Orbital cortical area, ventrolateral part (ORBvl)	2
Parasubiculum (PAR)	3
Prelimbic cortical area (PL)	11
Postsubiculum (POST)	3
Presubiculum (PRE)	7
Posterior parietal association area, caudal lateral part (PTLp c, l)	2
Posterior parietal association area, caudal medial part (PTLp c, m)	5
Retrosplenial cortical area, agranular part (RSPagl)	2
Retrosplenial cortical area, dorsal part (RSPd)	3
Retrosplenial cortical area, ventral part (RSPv)	9
Superior colliculus (SC)	5
Subiculum, dorsal part (SUBd)	8
Subiculum, ventral part (SUBv)	7
Ventral tegmental nucleus (VTN)	3
	196
